# Supplementary material
Source: PubMed Central journal article supplement (PMC4731049)
Supplement: NIHMS726478-supplement-01.pdf [file NIHMS726478-supplement-01.pdf]

**Table S1. Aberrant tissue mineralization in *Enpp1<sup>asj</sup>* mice in different groups<sup>1)</sup>**

| Group <sup>2)</sup> | Soft tissue mineralization (%) |           |                      |           |           |
|---------------------|--------------------------------|-----------|----------------------|-----------|-----------|
|                     | Vibrissae                      | Kidney    | Heart                | Aorta     | Eyes      |
| <u>Set 1 (p.o.)</u> |                                |           |                      |           |           |
| A                   | 9/9 (100)                      | 8/9 (89)  | 7/9 (78)             | 4/9 (44)  | 6/9 (67)  |
| B                   | 9/9 (100)                      | 8/9 (89)  | 8/9 (89)             | 5/9 (56)  | 7/9 (78)  |
| C                   | 6/6 (100)                      | 5/6 (83)  | 3/6 (50)             | 3/6 (50)  | 1/6 (17)  |
| D                   | 8/8 (100)                      | 5/8 (63)  | 3/8 (38)             | 4/8 (50)  | 2/8 (25)  |
| E                   | 6/6 (100)                      | 5/6 (83)  | 4/6 (67)             | 2/6 (33)  | 3/6 (50)  |
| F                   | 7/7 (100)                      | 7/7 (100) | 5/7 (71)             | 4/7 (57)  | 4/7 (57)  |
| G                   | 8/8 (100)                      | 7/8 (88)  | 6/8 (75)             | 3/8 (38)  | 3/7 (43)  |
| H                   | 0/9 (0) <sup>+</sup>           | 2/9 (22)* | 0/9 (0) <sup>+</sup> | 0/9 (0)   | 0/9 (0)*  |
| <u>Set 2 (s.c.)</u> |                                |           |                      |           |           |
| I                   | 7/7 (100)                      | 6/7 (86)  | 5/7 (71)             | 2/5 (40)  | 5/7 (71)  |
| J                   | 8/8 (100)                      | 8/8 (100) | 7/8 (88)             | 2/8 (25)  | 4/8 (50)  |
| K                   | 11/11 (100)                    | 5/11(45)  | 5/11 (45)            | 1/10 (10) | 3/11 (27) |

<sup>1)</sup> The values represent the number of mice with any degree of mineralization in the total number of mice examined (percent) in tissues, as examined by hematoxylin and eosin stain on one section. Statistical analyses were performed with Fisher's Exact test. \*  $p < 0.05$ , <sup>+</sup>  $p < 0.01$ , as compared with mice in group A.

<sup>2)</sup> For description of different groups, see Table 1. p.o., perioral; s.c., subcutaneous.

**Table S2. Calcium and phosphorus concentrations in the serum of mice<sup>1)</sup>**

| Group <sup>2)</sup> | Serum concentration |                       |             |
|---------------------|---------------------|-----------------------|-------------|
|                     | Calcium<br>(mg/dL)  | Phosphorus<br>(mg/dL) | Ca/P ratio  |
| <u>Set 1 (p.o.)</u> |                     |                       |             |
| A                   | 9.8 ± 0.2           | 6.4 ± 0.4             | 1.58 ± 0.08 |
| B                   | 10.6 ± 0.3          | 6.2 ± 0.4             | 1.78 ± 0.15 |
| C                   | 10.2 ± 0.1          | 7.3 ± 0.7             | 1.46 ± 0.12 |
| D                   | 10.0 ± 0.4          | 7.3 ± 0.6             | 1.42 ± 0.12 |
| E                   | 10.6 ± 0.2*         | 6.4 ± 0.3             | 1.66 ± 0.08 |
| F                   | 10.5 ± 0.5          | 5.7 ± 0.2             | 1.85 ± 0.10 |
| G                   | 10.3 ± 0.2          | 6.4 ± 0.1             | 1.62 ± 0.05 |
| H                   | 10.5 ± 0.3          | 7.2 ± 0.3             | 1.49 ± 0.08 |
| <u>Set 2 (s.c.)</u> |                     |                       |             |
| I                   | 8.9 ± 0.2           | 6.8 ± 0.4             | 1.34 ± 0.08 |
| J                   | 9.4 ± 0.3           | 6.6 ± 0.7             | 1.54 ± 0.17 |
| K                   | 9.9 ± 0.2*          | 6.7 ± 0.6             | 1.57 ± 0.11 |

<sup>1)</sup>Data are expressed as means ± SE. n = 6-11. \*  $p < 0.05$ , as compared with *asj* mice on control diet (E vs. A) or received saline injection (K vs. I).

<sup>2)</sup>For description of different groups, see Table 1. p.o., perioral; s.c., subcutaneous.
